# Supplementary material
Source: publisher figshare collection journal article supplement (https://tandf.figshare.com/ndownloader/files/37565128)
Supplement: Supplementary file 1 [file 37565128]

**Supplementary Table 1.** Comparison between participants with missing ToM data and with complete data

| **Variable** | **Participants with missing data**  **(N=33)** | **Participants with complete data**  **(N=173)** | ***p*-value** |
| --- | --- | --- | --- |
| Sex, male/female, No. | 16/17 | 85/88 | 0.95 |
| Age, mean (SD), y | 22.67 (2.70) | 23.08 (2.57) | 0.41 |
| Education, mean (SD), y | 14.30 (1.53) | 14.43 (1.40) | 0.63 |
| HCC, mean (SD), ng/μg | 9.31 (11.17) | 7.29 (8.10) | 0.22 |
| BDIa, mean (SD) | 6.64 (8.60) | 5.27 (6.82) | 0.32 |
| SAI, mean (SD) | 38.82 (8.14) | 36.22 (9.23) | 0.13 |
| PSS, mean (SD) | 25.76 (4.53) | 25.55 (5.87) | 0.85 |

a BDI data were available for 172 participants with complete data and all participants without ToM task data.

**Supplementary Table 2**. Moderation analysis for the association between ToMs and HCC according to the presence of childhood trauma

| **Predictor** | **β** | **SE** | ***t*** | ***p*** |
| --- | --- | --- | --- | --- |
|
| Constant | 3.24 | 0.33 | 9.69 | < 0.001 |
| ToMs | 0.01 | 0.01 | 0.65 | 0.52 |
| Childhood trauma | 0.02 | 0.06 | 0.26 | 0.80 |
| ToM × Childhood trauma | −0.01 | 0.02 | −0.76 | 0.45 |
| Age | 0.01 | 0.01 | 1.02 | 0.31 |
| Sex | 0.16 | 0.06 | 2.67 | 0.01 |
| Education | −0.01 | 0.03 | −0.26 | 0.80 |
| BDI | −0.005 | 0.01 | −0.92 | 0.36 |
| SAI | 0.01 | 0.004 | 2.14 | 0.03 |
| PSS | −0.01 | 0.01 | −1.05 | 0.30. |

**Supplementary Table 3**. Sensitivity analysis for moderation model to test the association between binary variable of ToMq and HCC according to the presence of childhood trauma

| **Predictor** | **β** | **SE** | ***t*** | ***p*** |
| --- | --- | --- | --- | --- |
| ToMq | -0.067 | 0.068 | -0.976 | 0.331 |
| Childhood trauma | 0.102 | 0.075 | 1.361 | 0.175 |
| ToMq × Childhood trauma | -0.234 | 0.111 | -2.112 | 0.036 |
| Age | 0.02 | 0.014 | 1.435 | 0.153 |
| Sex | 0.171 | 0.056 | 3.048 | 0.003 |
| Education | -0.007 | 0.026 | -0.286 | 0.775 |
| BDI | -0.006 | 0.005 | -1.175 | 0.242 |
| SAI | 0.009 | 0.004 | 2.322 | 0.021 |
| PSS | -0.006 | 0.006 | -1.019 | 0.31 |
